# Supplementary material
Source: PubMed Central journal article supplement (PMC3590309)
Supplement: NIHMS444880-supplement-supp.pdf [file NIHMS444880-supplement-supp.pdf]

1 SUPPLEMENTARY TABLE 1 Demographics and frequencies of signs/symptoms in  
 2 sCJD subjects with DWI MRI available that met DLB criteria compared to those that did  
 3 not.

|                           | sCJD whom did<br><u>not</u> meet<br>Probable DLB<br>criteria<br>N=29 | sCJD who met<br>Probable DLB<br>criteria<br>N=16 | P            |
|---------------------------|----------------------------------------------------------------------|--------------------------------------------------|--------------|
| Age onset (years)         | 61.69 +/-10.6                                                        | 59.94 +/- 14.3                                   | 0.671        |
| Duration (years)          | 12.86 +/- 10.1                                                       | 12.94 +/- 8.3                                    | 0.979        |
| Time to dementia (months) | 3.10 +/- 7.8                                                         | 1.38 +/- 3.0                                     | 0.296        |
| Sex                       | 20M (69%)                                                            | 4M (25%)                                         | <b>0.006</b> |
| Pyramidal Signs           | 25 (87%)                                                             | 15 (94%)                                         | 0.641        |
| Cerebellar                | 18 (62%)                                                             | 11 (69%)                                         | 0.752        |
| Myoclonus                 | 19 (66%)                                                             | 10 (63%)                                         | 1            |
| Visual Symptoms           | 16 (55%)                                                             | 13 (81%)                                         | 0.11         |
| Akinetic mutism           | 7 (24%)                                                              | 1 (6%)                                           | 0.226        |
| Focal Cortical signs      | 24 (83%)                                                             | 12 (75%)                                         | 0.700        |
| Hallucinations            | 8 (28%)                                                              | 11 (69%)                                         | <b>0.012</b> |
| Fluctuations              | 6 (21%)                                                              | 6 (38%)                                          | 0.310        |
| Parkinsonism              | 33 (87%)                                                             | 17 (94%)                                         | 0.296        |
| Dementia                  | 28 (97%)                                                             | 16 (100%)                                        | 1            |
| 14-3-3                    | 6 Pos; 7 Neg; 6<br>Inconclusive                                      | 3 Pos; 4 Neg; 4<br>Inconclusive                  | 0.746        |

4
